# Supplementary material for: A cell-based screening system for influenza A viral RNA transcription/replication inhibitors
Source: PubMed Central journal article supplement — Sci Rep. 2013 Jan 22;3:1106. doi: 10.1038/srep01106 (PMC3551287; doi:10.1038/srep01106), 2013-01-22

## Supplementary Information

# A cell-based screening system for influenza A viral RNA transcription/replication inhibitors

Makoto Ozawa<sup>1,2†</sup>, Masayuki Shimojima<sup>3‡</sup>, Hideo Goto<sup>3</sup>, Shinji Watanabe<sup>2,4</sup>, Yasuko Hatta<sup>2§</sup>, Maki Kiso<sup>3</sup>, Yousuke Furuta<sup>5</sup>, Taisuke Horimoto<sup>3¶</sup>, Noel R. Peters<sup>6</sup>, F. Michael Hoffmann<sup>6</sup>, and Yoshihiro Kawaoka<sup>1,2,3,4\*</sup>

<sup>1</sup>Department of Special Pathogens, International Research Center for Infectious Diseases, Institute of Medical Science, University of Tokyo, Tokyo 108-8639, Japan

<sup>2</sup>Influenza Research Institute, Department of Pathobiological Sciences, School of Veterinary Medicine, University of Wisconsin-Madison, Madison, WI 53711, USA

<sup>3</sup>Division of Virology, Department of Microbiology and Immunology, Institute of Medical Science, University of Tokyo, Tokyo 108-8639, Japan

<sup>4</sup>ERATO Infection-Induced Host Responses Project, Saitama 332-0012, Japan

<sup>5</sup>Toyama Chemical Co., Ltd., Toyama 930-8508, Japan

<sup>6</sup>UW Small Molecule Screening Facility and Medicinal Chemistry Core Facility, University of Wisconsin-Madison, Madison, WI 53792, USA

<sup>†</sup>Present address: Laboratory of Animal Hygiene, Joint Faculty of Veterinary Medicine, Kagoshima University, 1-21-24 Korimoto, Kagoshima 890-0065, Japan

<sup>‡</sup>Present address: Laboratory of Veterinary Microbiology, Faculty of Agriculture, Yamaguchi University, 1677-1 Yoshida, Yamaguchi 753-8515, Japan.

<sup>§</sup>Present address: FluGen, Inc. 545 Science Drive, Madison, WI 53711, USA

<sup>¶</sup>Present address: Department of Veterinary Microbiology, Graduate School of Agricultural and Life Sciences, University of Tokyo, 1-1-1 Yayoi, Bunkyo-ku, Tokyo 113-8657, Japan.

\*Correspondence should be addressed to:

Yoshihiro Kawaoka, DVM, Ph.D.

Influenza Research Institute, Department of Pathobiological Sciences, School of Veterinary Medicine, University of Wisconsin-Madison, 575 Science Drive, Madison, WI 53711, USA

Phone: +1-608-265-4925

Fax: +1-608-265-5622

E-mail: [kawaokay@svm.vetmed.wisc.edu](mailto:kawaokay@svm.vetmed.wisc.edu)

1 **Legends to Supplementary Figures**

2

3 **Supplementary Figure S1. Virus-like vRNA expression by transduction with an**  
4 **envelope-uncoated retroviral vector.** 293 cells were transduced with the VSVG-coated  
5 (left panels) and -uncoated (right panels) retroviral vectors for the expression of the GFP-  
6 encoding virus-like RNA. Simultaneously, the cells were transfected with plasmids for  
7 the expression of the polymerase subunits and NP. Forty-eight hours later, GFP  
8 expression (green) and nuclei counter-stained by Hoechst dye (blue) were examined by  
9 fluorescence microscopy. Scale: 100  $\mu$ m.

10

11 **Supplementary Figure S2. Characterization of 293vRNP-Puro cells.** (A) Detection of  
12 mRNAs for viral proteins in 293vRNP-Puro cells. Total RNAs extracted from 293 (lanes  
13 1, 3, 6, 8, 11, 13, 16, 18, 21, and 23) and 293vRNP-Puro cells (lanes 2, 4, 7, 9, 12, 14, 17,  
14 19, 22, and 24) were reverse transcribed using an oligo(dT)<sub>16</sub> primer and amplified by  
15 PCR with specific primers for the 3' and 5' ends of the open reading frames of PB2  
16 (lanes 1-4), PB1 (lanes 6-9), PA (lanes 11-14), and NP (lanes 16-19) and hGAPDH-  
17 specific primers (lane 21-24). The open reading frames of PB2, PB1, PA, and NP were  
18 2280-, 2274-, 2151-, and 1497-nt in length, respectively. As positive controls, plasmids  
19 encoding the open reading frames of each protein were amplified by PCR with each  
20 specific primer set, respectively (lanes 5, 10, 15, and 20). The DNA sizes are shown on  
21 the left of panel. M, marker for DNA size; P, positive control; RT (-), omission of reverse  
22 transcription; RT (+), addition of reverse transcription. (B) Detection of virus-like RNA  
23 in 293vRNP-Puro cells. Total RNAs extracted from 293 (lanes 1 and 2) and 293vRNP-

24 Puro cells (lanes 3 and 4) were reverse transcribed using a random hexamer primer and  
25 amplified by PCR with primers specific for the 3' and 5' noncoding ends of HA vRNA  
26 (upper panel) and hGAPDH-specific primers (lower panel). The HA vRNA encoding the  
27 puromycin-resistance gene was 677-nt in length. As a positive control,  
28 pPolI/HA(0)Puro(0) was amplified by PCR (lane 5). The DNA sizes are shown on the  
29 left of each panel. M, marker for DNA size; P, positive control; RT (-), omission of  
30 reverse transcription; RT (+), addition of reverse transcription. (C) Functional expression  
31 of viral proteins required for vRNA transcription in individual 293vRNP-Puro cells.  
32 293vRNP-Puro cells were mock-transduced (left panels) or transduced with a virus-like  
33 RNA-expressing adenovirus vector AdV/PolI-GFP<sup>14</sup> at a multiplicity of infection of 10  
34 (right panels). Twenty-four hours later, GFP expression was examined by fluorescence  
35 microscopy (lower panels): upper panels show corresponding bright-field images.

36

37 **Supplementary Figure S3. Effect of favipiravir on influenza vRNA**  
38 **transcription/replication.** (A) Effect of favipiravir on influenza viral RNA  
39 transcription/replication in a minigenome assay. 293 cells were transfected with plasmids  
40 for the expression of a virus-like RNA encoding the firefly luciferase gene together with  
41 expression plasmids for PB2, PB1, PA, NP, and *Renilla* luciferase, which served as an  
42 internal control. Simultaneously, the indicated concentration of favipiravir dissolved in  
43 DMSO was added to the cells. Twenty-four hours later, luciferase activity was measured  
44 by use of the Dual-Luciferase® Reporter Assay System (Promega). Error bars indicate  
45 standard deviations of three independent experiments. (B) Effect of favipiravir on  
46 293vRNP-Puro cell viability. 293vRNP-Puro cells were cultured with the indicated

47 concentration of favipiravir dissolved in DMSO in the presence (black circle) and  
48 absence (white circle) of puromycin for 96 h. Cell viability was measured by using the  
49 CellTiter-Glo® Luminescent Cell Viability Assay (Promega). Error bars indicate  
50 standard deviations of three independent experiments.

51

52 **Supplementary Figure S4. Identification of influenza vRNA**  
53 **transcription/replication inhibitor candidates through 293vRNP-Puro cell-based**  
54 **screening.** (A) Scheme of 293vRNP-Puro cell-based screening system for vRNA  
55 transcription/replication inhibitors. (B) Effect of identified compounds on 293vRNP-Puro  
56 cell viability. 293vRNP-Puro cells were cultured with the indicated compound (10  $\mu$ M  
57 each) or DMSO (Ctrl) in the presence (black bar, from three independent experiments)  
58 and absence (gray bar, from two independent experiments) of puromycin for 96 h. Cell  
59 viability was measured by using the CellTiter-Glo® Luminescent Cell Viability Assay  
60 (Promega). Error bars indicate standard deviations.

**VSVG (+)**

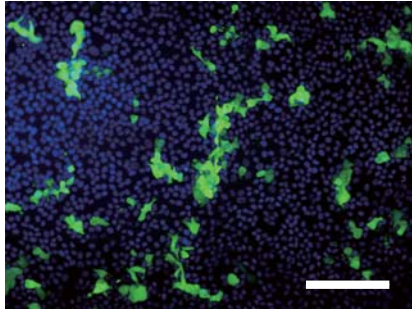

**VSVG (-)**

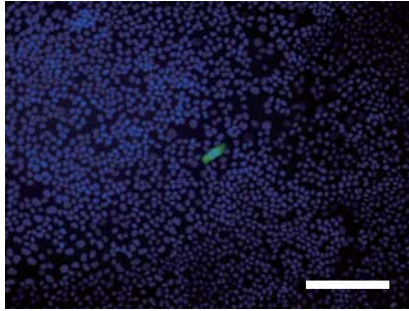

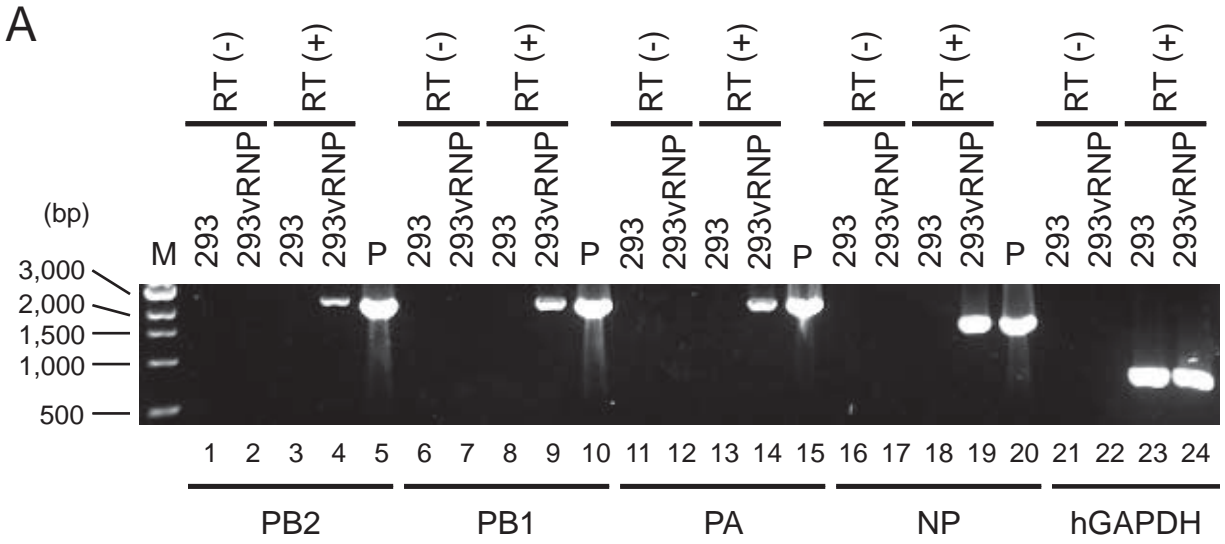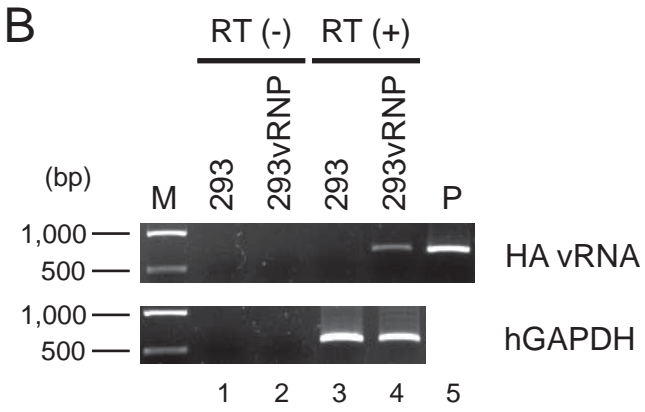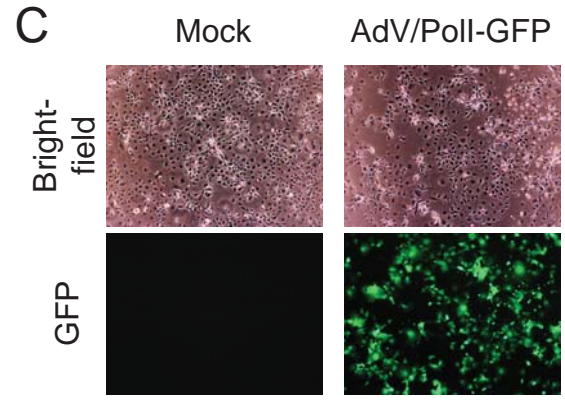

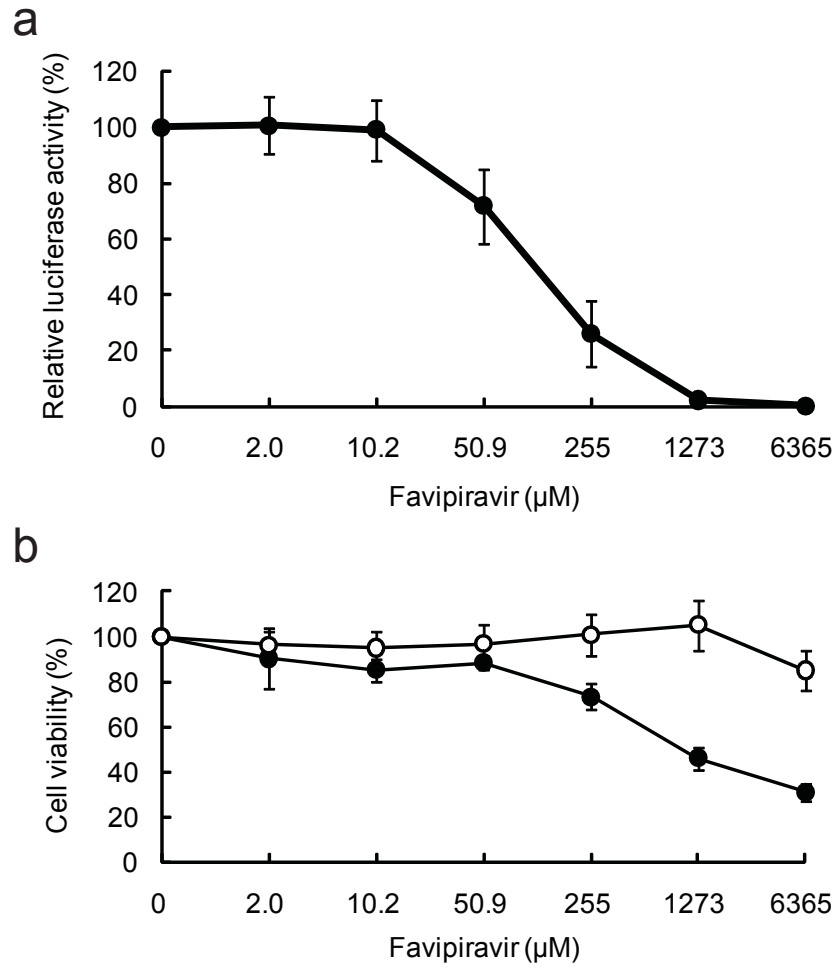

**a**

Procedures:

<Day 0> 293vRNP-Puro cells were seeded on 384-well plates (1,000 cells/well) in normal or puromycin-containing medium.

<Day 1> Compounds (10  $\mu$ M) were added to the cells.

<Day 5> Cell viability was measured by CellTiter-Glo<sup>®</sup> Luminescent Cell Viability Assay.

Criteria:

<1st round> >50% and <20% cell viability in normal and puromycin-containing medium, respectively, were considered as positive.

<2nd round> >90% and <5% cell viability in normal and puromycin-containing medium, respectively, were considered as positive.

**b**

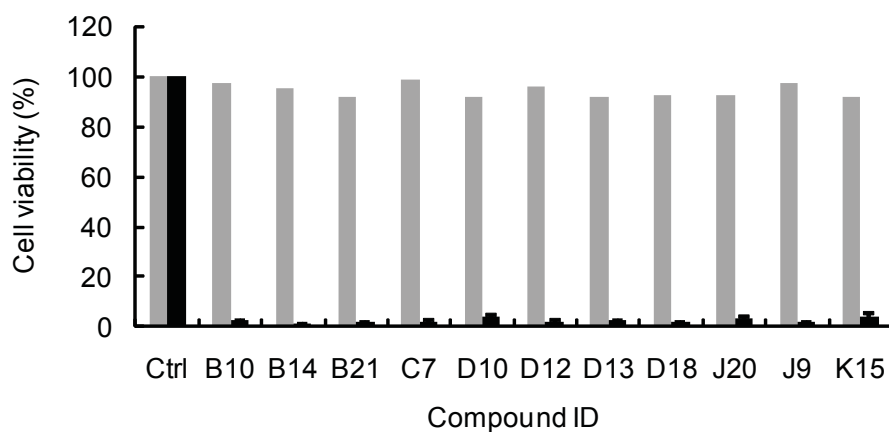

Supplement: srep01106-s1.pdf [file srep01106-s1.pdf]
